# Supplementary material for: Overexpression of ScMYBAS1 alternative splicing transcripts differentially impacts biomass accumulation and drought tolerance in rice transgenic plants
Source: PubMed Central journal article supplement (PMC6281192; doi:10.1371/journal.pone.0207534), 2018-12-05
Supplement: pone.0207534.s001.pdf [file pone.0207534.s001.pdf]

```
310 320 330 340 350 360 370 380 390 400
16MYB2094 .....
```

```
410 420 430 440 450 460 470 480 490 500
16MYB2094 .....
```

```
510 520 530 540 550 560 570 580 590 600
16MYB2094 .....
```



```
16MYB2094  GA
24MYB2094  GA
8MYB2094   --
11MYB2094  --
3MYB2094   --
17MYB2094  --
1MYB2094   --
8MYB7065   GA
2MYB7065   GA
17MYB7065  GA
22MYB7065  GA
15MYB7065  GA
20MYB7065  GA
21MYB7065  GA
7MYB7065   GA
13MYB7065  GA
2MYB2094   --
12MYB2094  --
4MYB2094   --
13MYB2094  --
19MYB2094  --
22MYB2094  --
3MYB7065   GA
6MYB7065   GA
14MYB2094  GA
20MYB2094  GA
23MYB2094  GA
9MYB7065   --
15MYB2094  --
10MYB7065  GA
11MYB7065  GA
14MYB7065  GA
21MYB2094  GA
MYB_Mazz   GA
Clustal Consensus
```
