# Supplementary material for: Overexpression of ScMYBAS1 alternative splicing transcripts differentially impacts biomass accumulation and drought tolerance in rice transgenic plants
Source: PubMed Central journal article supplement (PMC6281192; doi:10.1371/journal.pone.0207534), 2018-12-05
Supplement: pone.0207534.s003.pdf [file pone.0207534.s003.pdf]

**S1 Table**

|                   | <b>AtMYB59-3</b> | <b>AtMYB48-3</b> | <b>OsMYBAS1-1</b> | <b>OSMYBAS1-3</b> | <b>ZmMYB88</b> | <b>ScMYBAS1-4</b> | <b>ScMYBAS1-3</b> | <b>SbMYB23</b> | <b>ScMYBAS1-2</b> | <b>ScMYBAS1-5</b> |
|-------------------|------------------|------------------|-------------------|-------------------|----------------|-------------------|-------------------|----------------|-------------------|-------------------|
| <b>AtMYB59-3</b>  | 100.00           | 80.60            | 44.44             | 55.96             | 56.67          | 46.90             | 58.10             | 58.10          | 48.28             | 33.01             |
| <b>AtMYB48-3</b>  | 80.60            | 100.00           | 37.50             | 49.11             | 51.16          | 41.06             | 53.49             | 53.02          | 42.38             | 25.69             |
| <b>OsMYBAS1-1</b> | 44.44            | 37.50            | 100.00            | 100.00            | 72.22          | 70.37             | 71.60             | 72.84          | 72.22             | 64.17             |
| <b>OSMYBAS1-3</b> | 55.96            | 49.11            | 100.00            | 100.00            | 78.41          | 70.37             | 77.97             | 79.30          | 72.22             | 64.17             |
| <b>ZmMYB88</b>    | 56.67            | 51.16            | 72.22             | 78.41             | 100.00         | 86.50             | 89.04             | 90.79          | 89.57             | 85.95             |
| <b>ScMYBAS1-4</b> | 46.90            | 41.06            | 70.37             | 70.37             | 86.50          | 100.00            | 89.57             | 92.02          | 92.02             | 90.91             |
| <b>ScMYBAS1-3</b> | 58.10            | 53.49            | 71.60             | 77.97             | 89.04          | 89.57             | 100.00            | 94.30          | 94.48             | 92.56             |
| <b>SbMYB23</b>    | 58.10            | 53.02            | 72.84             | 79.30             | 90.79          | 92.02             | 94.30             | 100.00         | 95.09             | 94.21             |
| <b>ScMYBAS1-2</b> | 48.28            | 42.38            | 72.22             | 72.22             | 89.57          | 92.02             | 94.48             | 95.09          | 100.00            | 99.17             |
| <b>ScMYBAS1-5</b> | 33.01            | 25.69            | 64.17             | 64.17             | 85.95          | 90.91             | 92.56             | 94.21          | 99.17             | 100.00            |
